# Supplementary material for: Structure of the initiation-competent RNA polymerase I and its implication for transcription
Source: PubMed Central journal article supplement (PMC4947174; doi:10.1038/ncomms12126), 2016-07-15
Supplement: ncomms12126-s1.pdf [file ncomms12126-s1.pdf]

## Supplementary data and figures (PilsI et al.)

### Supplementary Figures

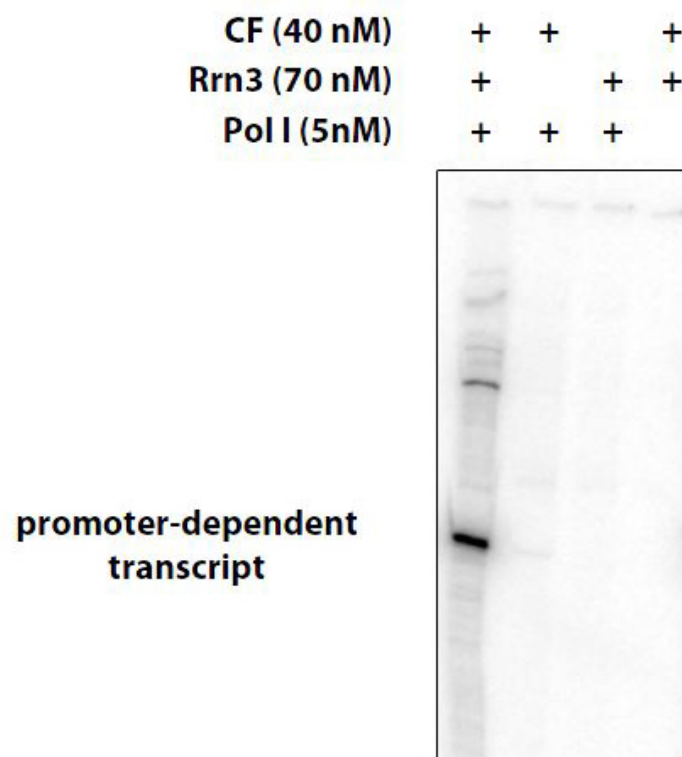

**Supplementary Fig. 1:** Reconstitution of promoter-dependent transcription.

Purified Pol I from strain y2423 was transcribed with or without recombinant purified CF and/or Rrn3 using the Pol I promoter-containing and linearized plasmid pMAX. Transcription was performed as described in the Methods part.

**a**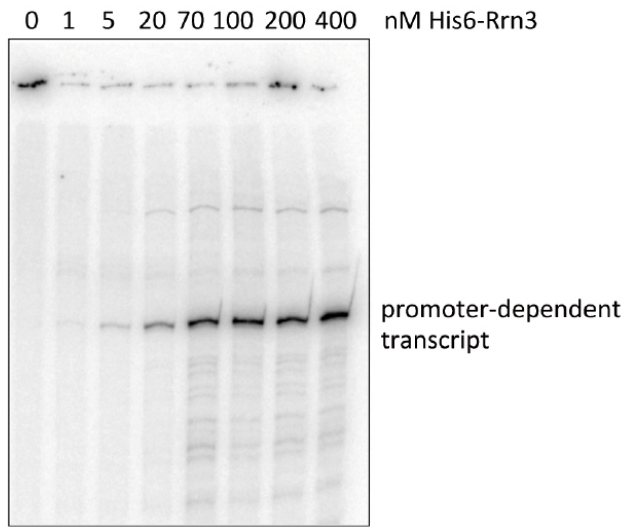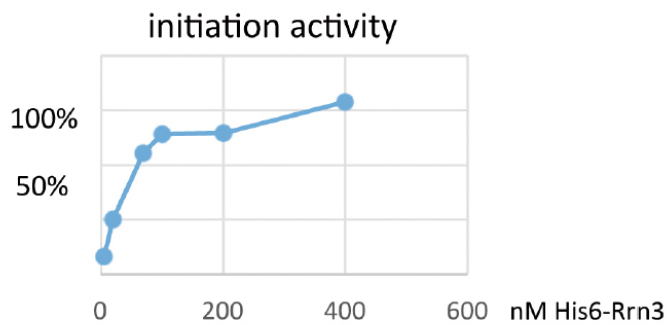**b**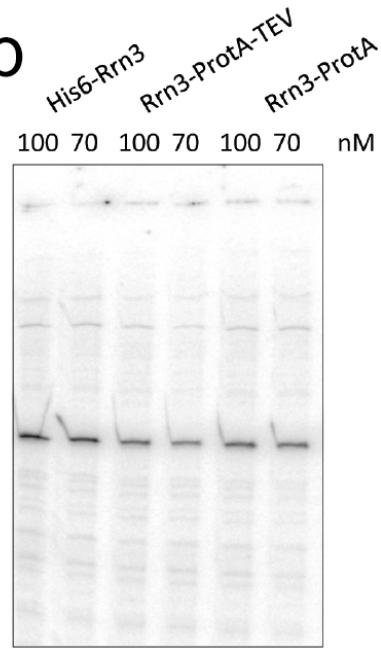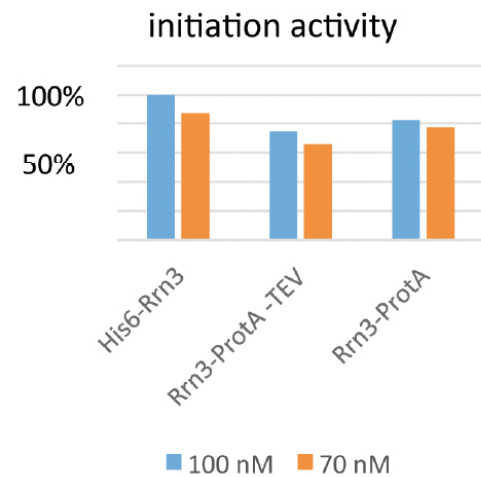

**Supplementary Fig. 2:** Titration of recombinant Rrn3 containing different epitope tags to constant amounts of Pol I and CF. Rrn3 proteins were expressed in E.coli, purified and their concentration was determined. a) Rising amounts of His3-Rrn3 were used in promoter-dependent transcription containing 5 nM Pol I and 40 nM CF. b) Comparison of different tagged Rrn3 proteins in promoter dependent transcription containing 5nM Pol I and 40 nM CF.

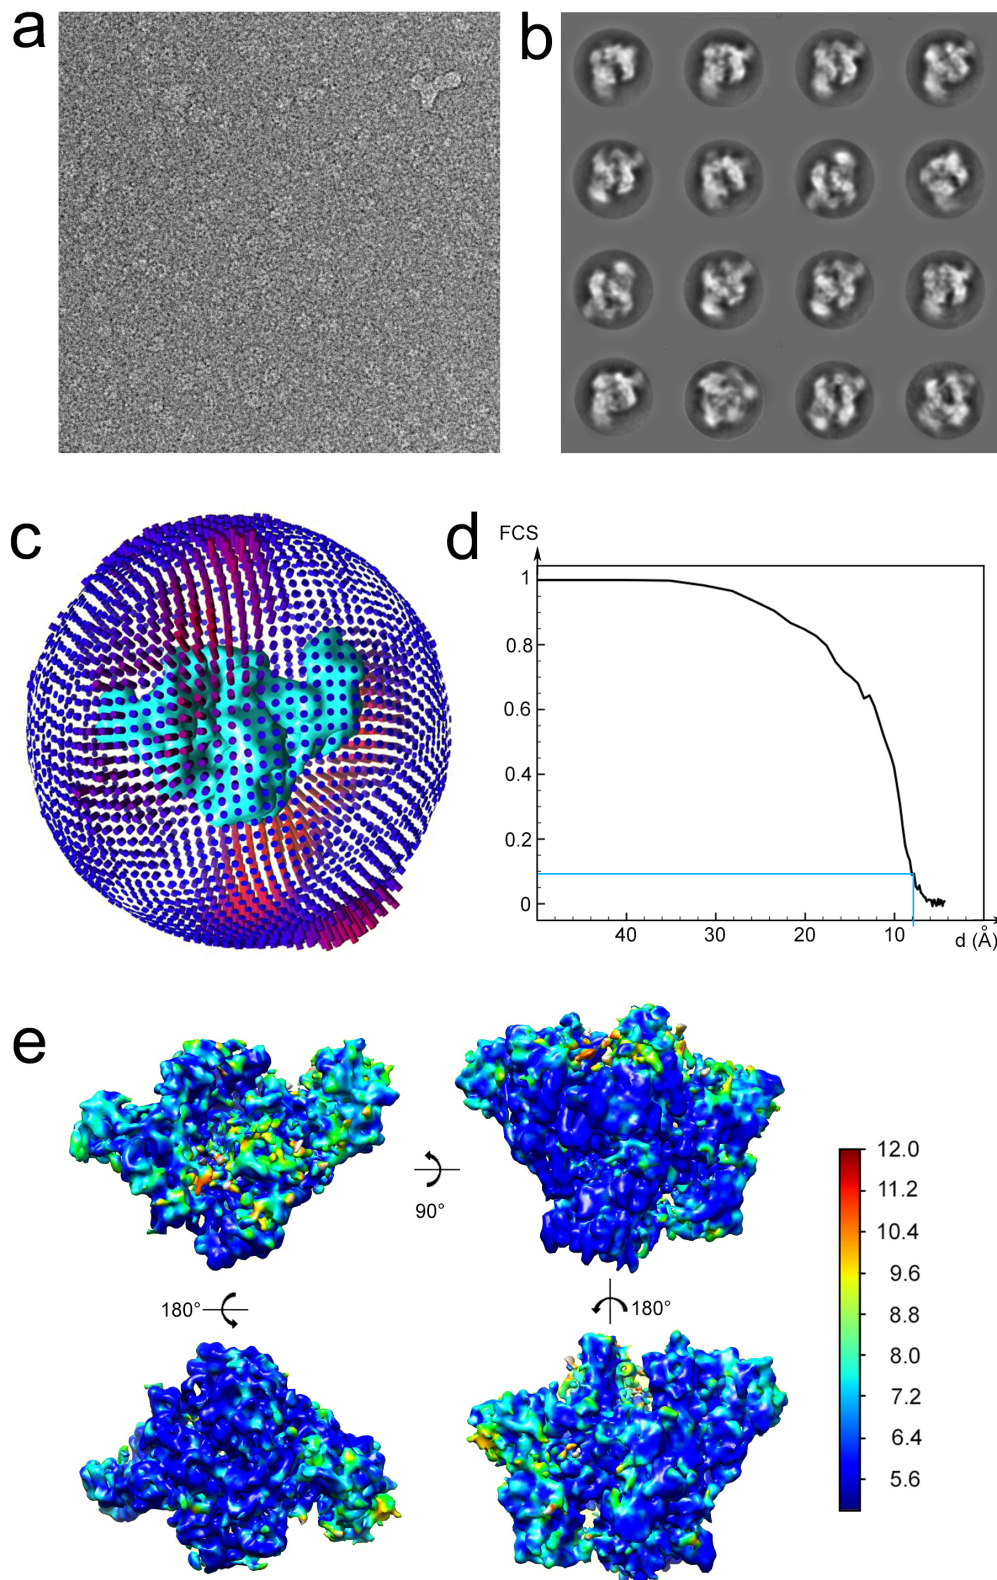

**Supplementary Fig. 3:** Structural analysis of the Pol I-Rrn3 complex.

a) Original images of the frozen-hydrated Pol I -Rrn3 complex adsorbed on a thin carbon film. b) Two-dimensional class averages obtained using the relion software. c) Angular distribution of the images used for 3-D reconstruction. d) Fourier Shell Correlation curve as a function of distance in Å. e) Local resolution map obtained using the Resmap software.

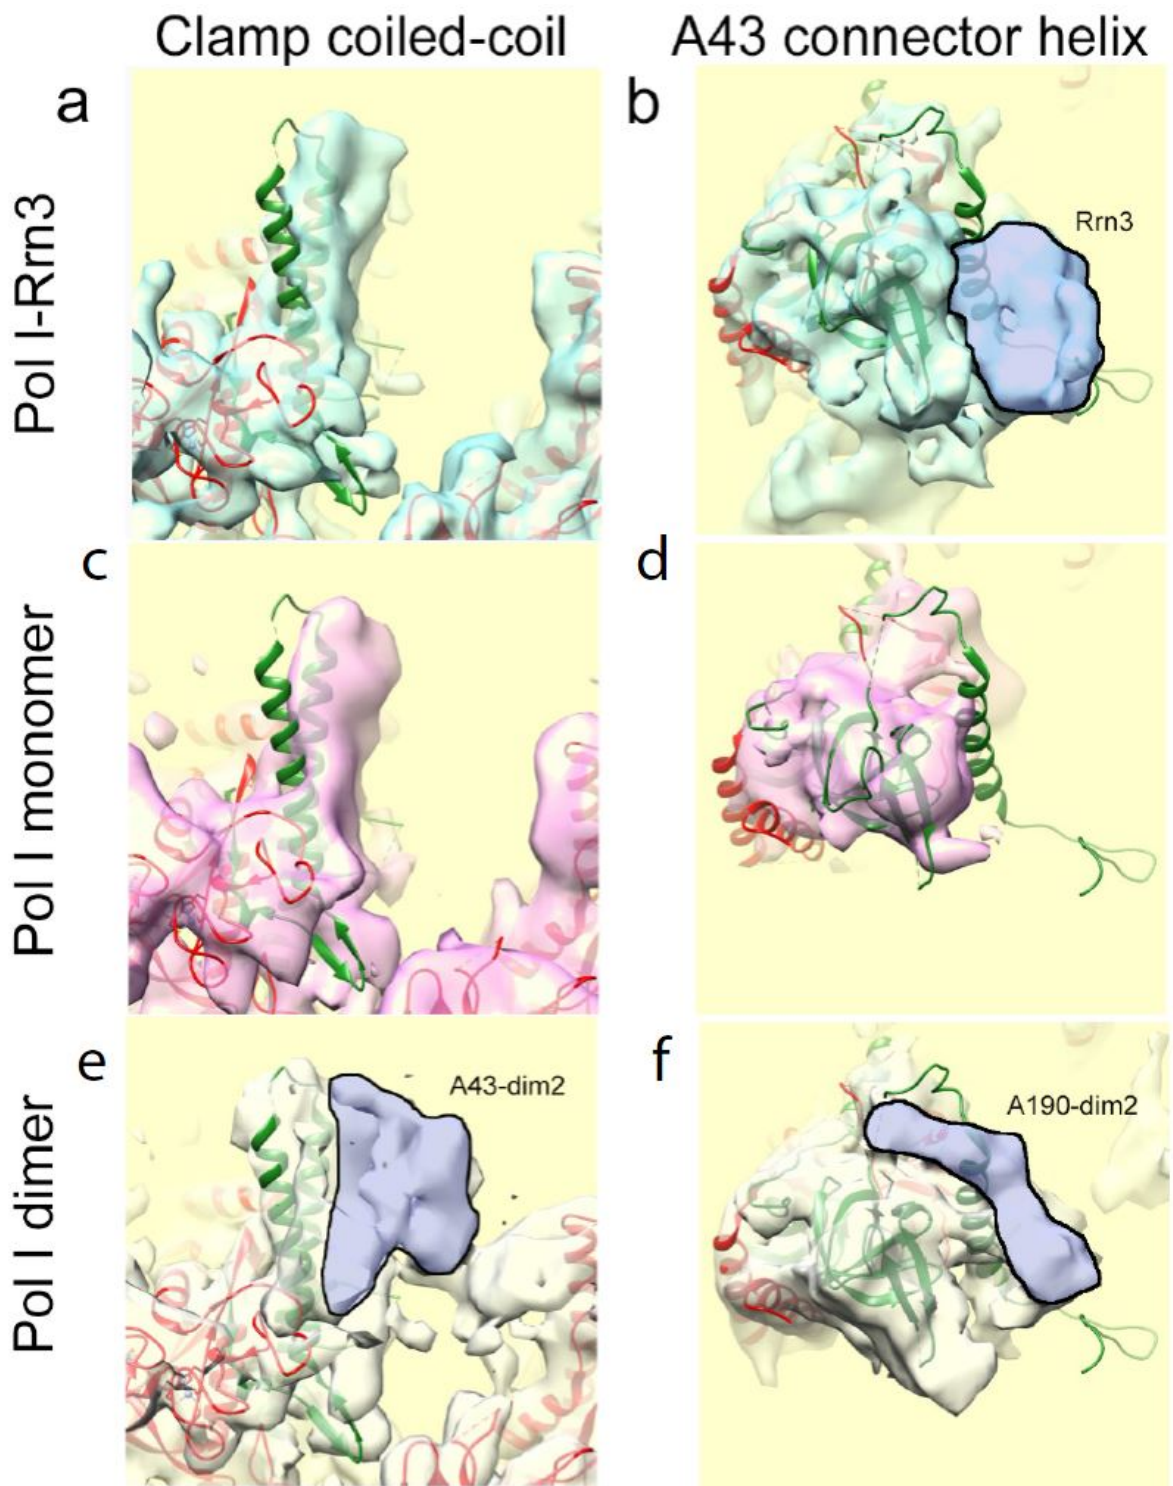

**Supplementary Fig. 4:** Comparison of key structural features in different Pol I conformational states. Positions of the clamped coil domains (subunit A190) (a, c, e) and connector helix (subunit A43) (b, d, f) are shown in green in the cryo-EM maps of the Pol I- Rrn3 complex (a, b), the Pol I monomer (c, d) and the Pol I dimer (e, f). Electron dense parts of Rrn3 or the dimerizing Pol I (A43-dim2, A190-dim2) molecule are indicated in light blue.

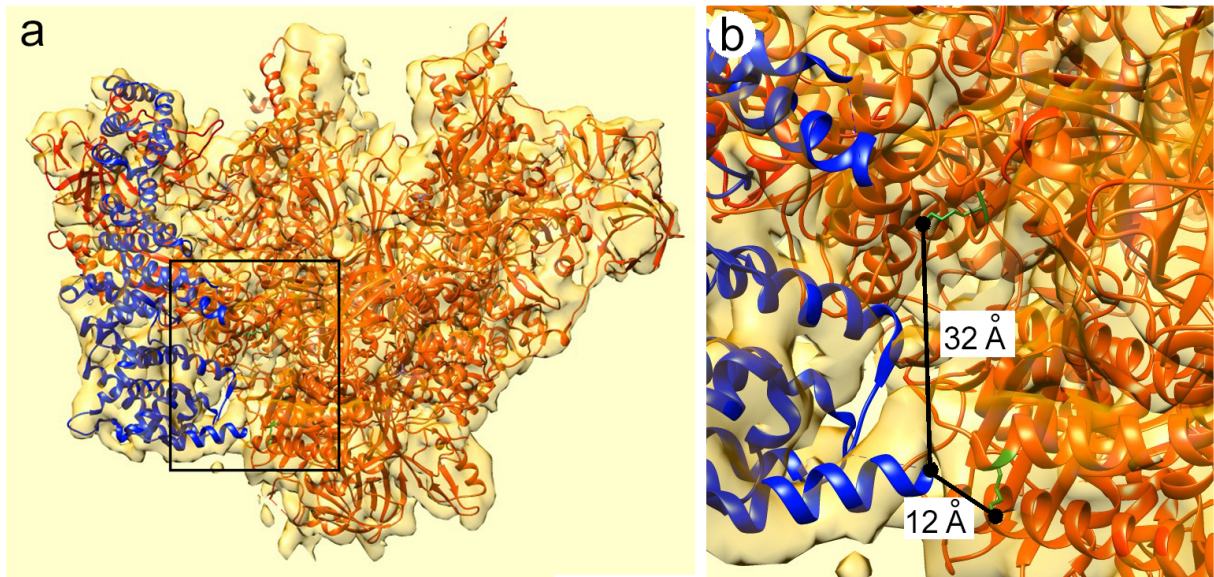

**Supplementary Fig. 5:** Localization of BS3 cross-links between Pol I and Rrn3 as identified in <sup>1</sup>

Two bis-sulfosuccinimidyl-suberate intersubunit cross-linked lysine pairs were identified in the Rrn3/pol I interface, within the area highlighted in a) and enlarged in b). The only reactive Rrn3 lysine 558 is located within an unresolved loop. The distances measured between the basis of the loop and the reactive AC40 lysine 329 (12 Å) and A190-lysine 582 (32 Å) are within reach of the crosslinker and are thus consistent with our model.

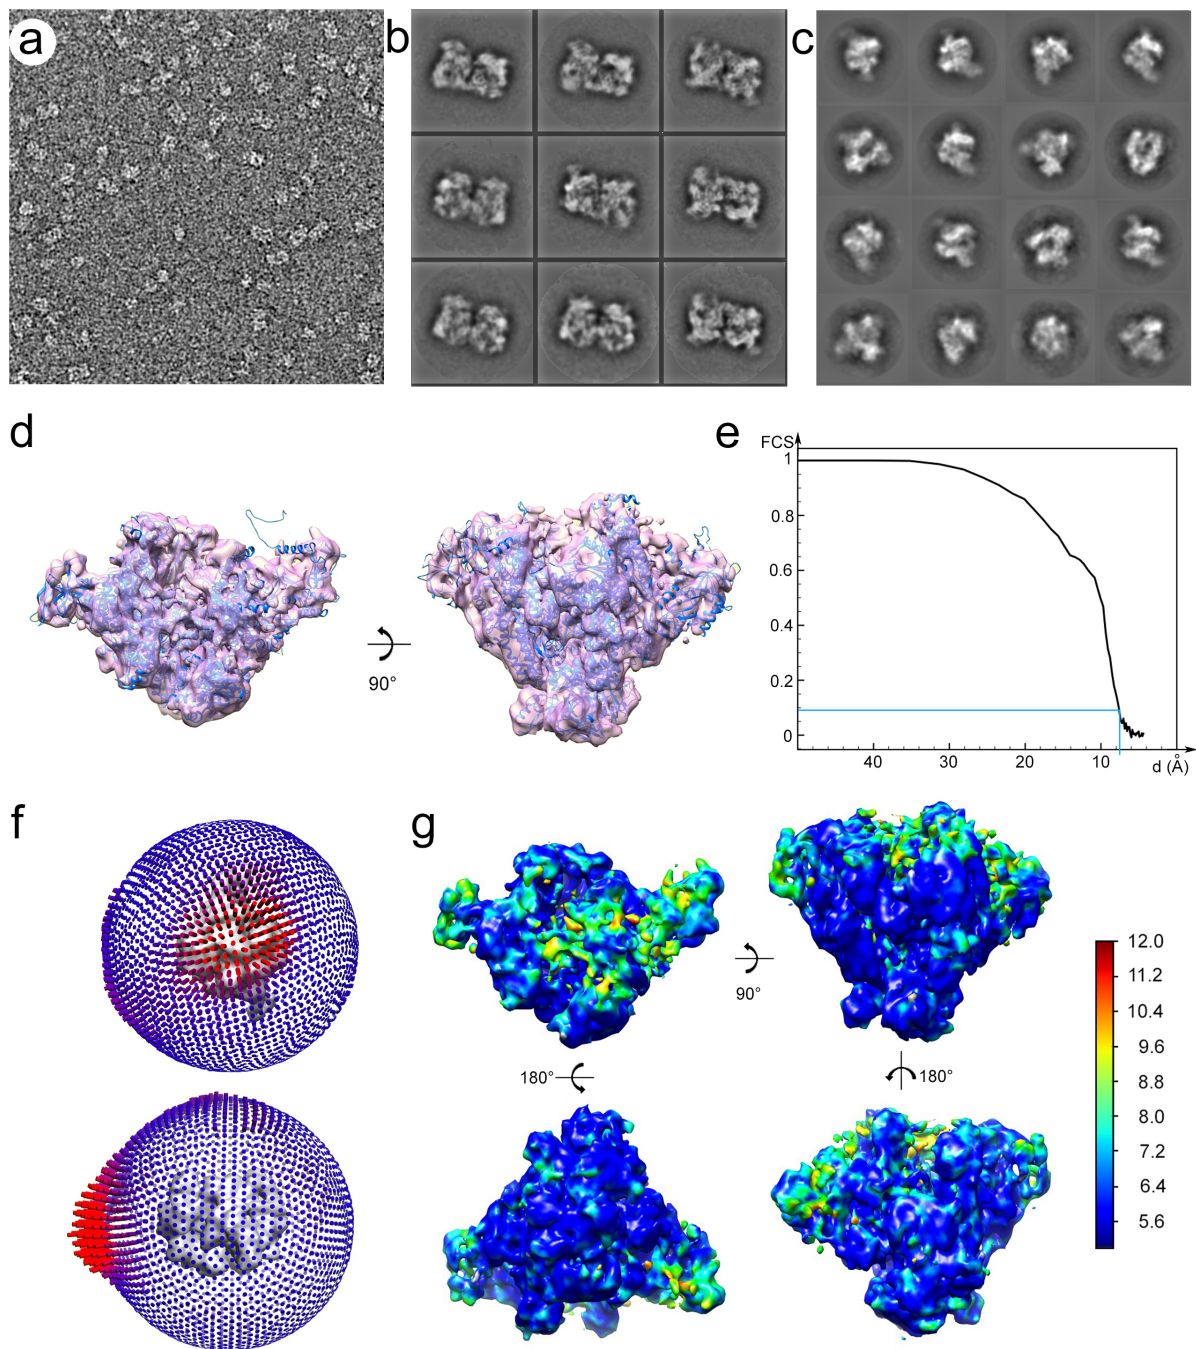

**Supplementary Fig. 6:** CryoEM structure of the monomeric Pol I.

a) Highly defocused original image of the frozen-hydrated Pol I molecules adsorbed on a thin carbon film. Pol I dimers and monomers can be distinguished. b) Two-dimensional class averages of Pol I dimers c) Two-dimensional class averages of Pol I monomers. d) Atomic structure of Pol I (blue ribbons) docked into the cryo-EM map of the Pol I monomer (pink envelope). e) Fourier Shell Correlation curve of the Pol I dimer dataset as a function of distance in Å. f) Angular distribution of the images used for 3-D reconstruction. g) Local resolution map obtained using the Resmap software.

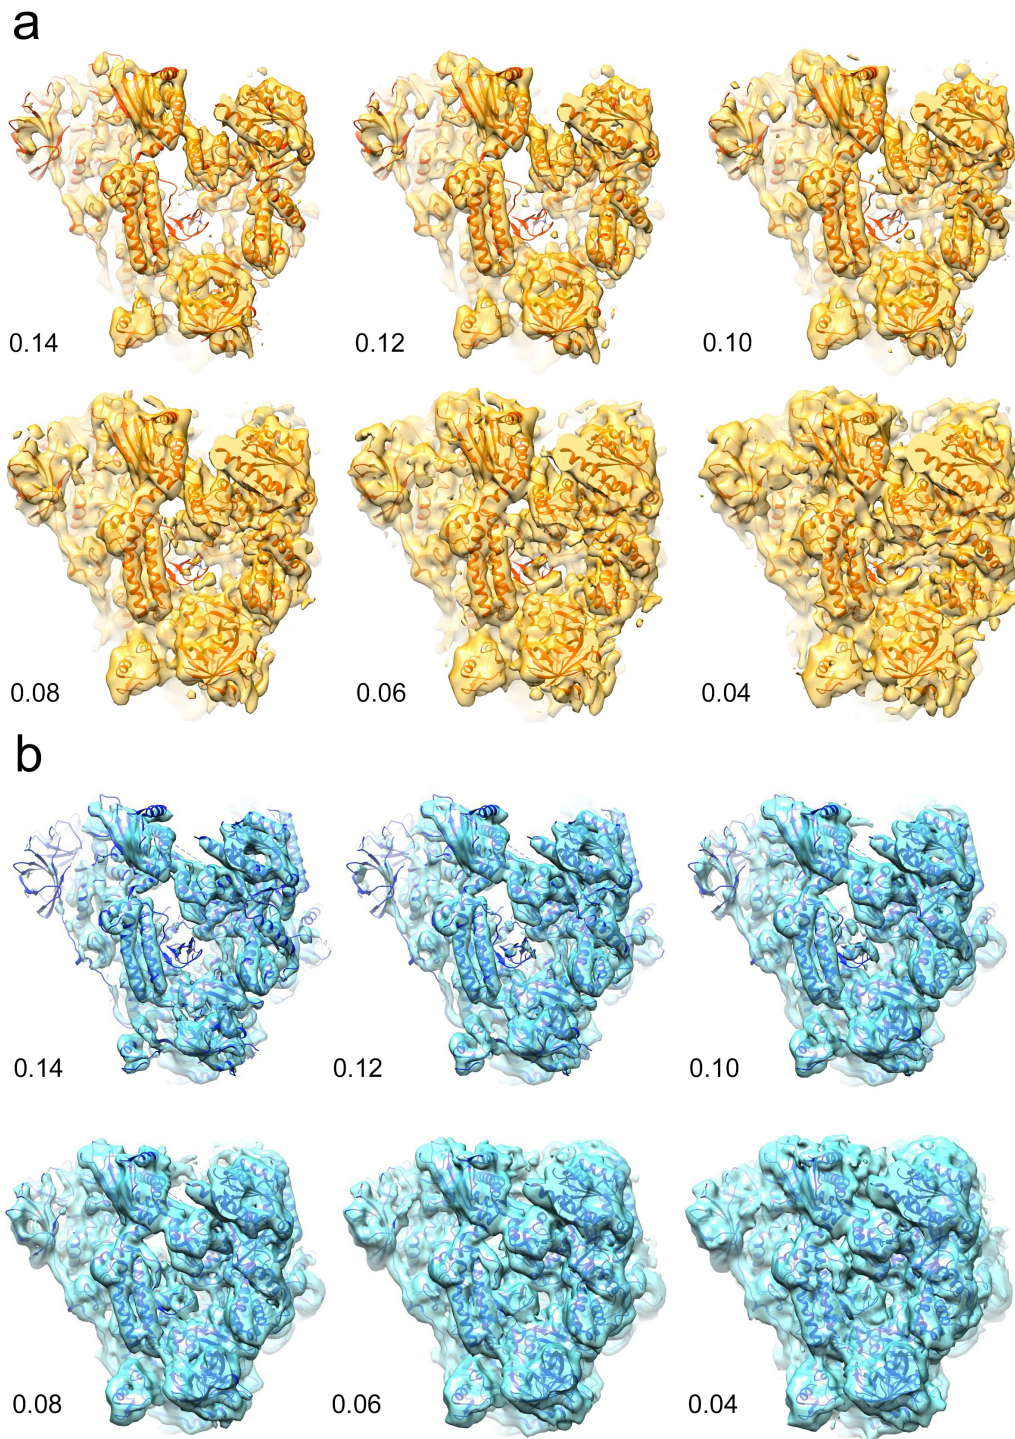

**Supplementary Fig. 7:** View of the Pol I atomic structure docked into the cryo EM model of the Pol I-Rrn3 complex (a) and of the Pol I dimer (b) along the nucleotide entry pore and the C-terminus of A12.2 (center of the maps). The threshold of applied onto the cryo-EM maps has been lowered from 0.14 to 0.04 to visualize the progressive filling of the pore by a density similar in shape to the C-terminus of A12.2 in the case of the Pol I dimer while the pore remains free in the case of the Pol I-Rrn3 complex

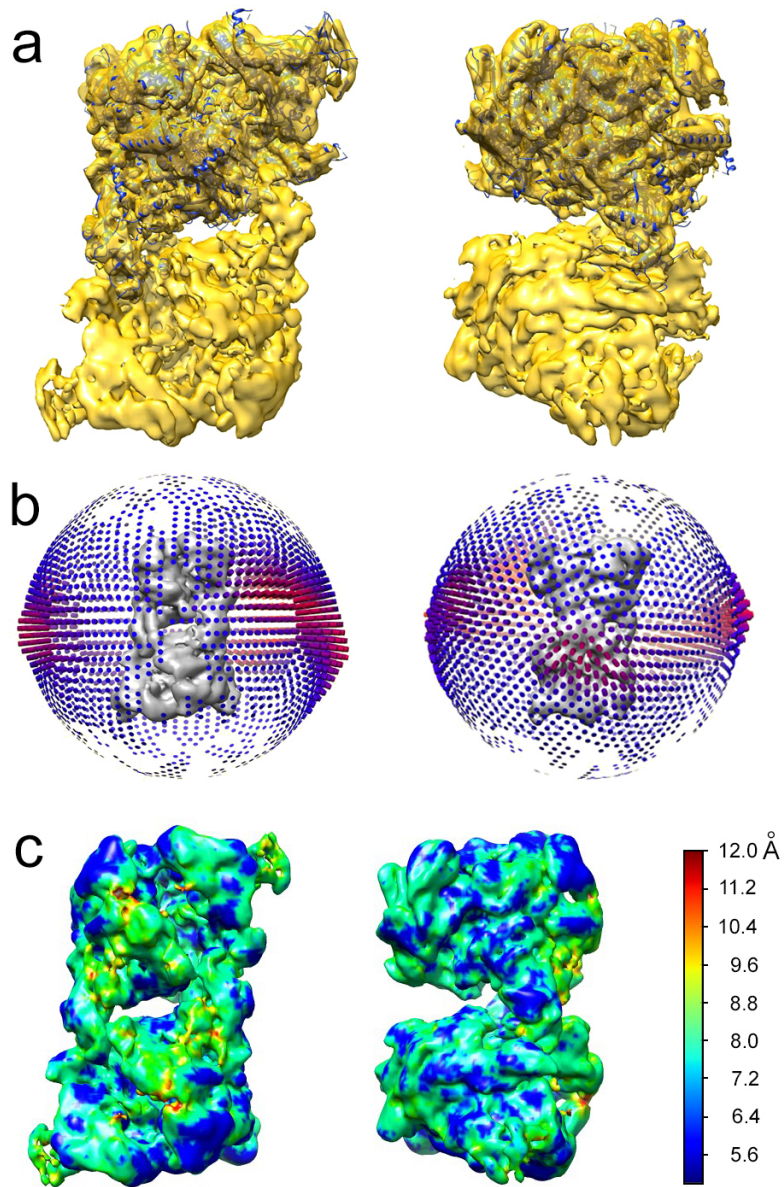

**Supplementary Fig. 8:** CryoEM structure of the dimeric form of Pol I.

a) Atomic structure of Pol I (blue ribbons) docked into the cryo-EM map of the Pol I dimer (yellow envelope). b) Angular distribution of the images used for 3-D reconstruction. c) Local resolution map.



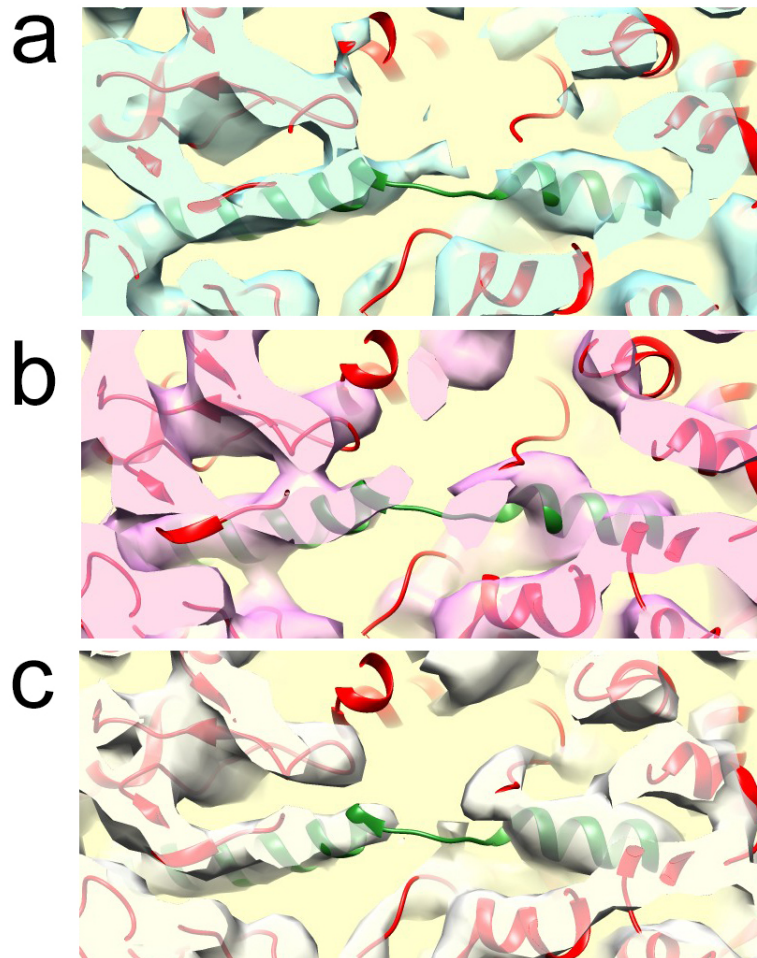

**Supplementary Fig. 9:** Structure of the bridge helix in different Pol I conformational states.

Shape of the locally unfolded bridge helix in the cryo-EM maps of the Pol I- Rrn3 complex (a), the Pol I monomer (b) and the Pol I dimer (c).

## Supplementary Tables

**Table 1: Strains**

| Strain | Name                           | Parental strain | Genotype                                                                             | Reference  |
|--------|--------------------------------|-----------------|--------------------------------------------------------------------------------------|------------|
| y2423  | BY4741 A135-TEV-ProtA          | BY4741          | MATa, <i>his3-1 leu2-0 met15-0 ura3-0 rpa135::RPA135-TEV-ProtA-kanMX6</i>            | 2          |
| y2183  | BSY420-Rrn3-TEV-ProtA-His7-Tag | BSY420          | MATa, , <i>ade2-1 ura3-1 trp1-1 leu2-3,112 his3-200 RRN3-TEV-ProtA-7HIS</i>          | 3          |
| Y2670  | yJPF162-1a                     | BY4741          | <i>his31; leu20; met15-0; ura3-0; RPA135-TEV-ProtA::kanMX6 HIS3MX::GAL::HA-RPA49</i> | this study |

**Table 2: Plasmids**

|      |                                  |                                                                                                                                                                     |            |
|------|----------------------------------|---------------------------------------------------------------------------------------------------------------------------------------------------------------------|------------|
| 435  | pMAX1                            | SacI-fragment (3780 bp) from YepSIRT <sup>4</sup> containing ETS1 including Pol I promoter and 520 bp at the C-terminus of 25S rDNA cloned in pBluescript (6731 bp) | this study |
| 2145 | pUC 19 tail g- TER elongated     | Tailed template DNA containing 18 S rDNA for unspecific in vitro transcription                                                                                      | 3          |
| 729  | Ycplac111-GAL-Rrn3-TEV-ProtA-HIS | GAL-dependent Rrn3 overexpression vector (Amp; LEU)                                                                                                                 | 3          |
| 2250 | pET28b A49/34.5                  | expression vector for A49/34.5 heterodimer                                                                                                                          | 5          |
| 2400 | pET28b His6-Rrn3                 | expression vector for Rrn3                                                                                                                                          | 1          |
| 2401 | pET Duet CF                      | expression vector for CF                                                                                                                                            | 6          |
| 2402 | pET24a Rrn3-TEV-ProtA-His7       | expression vector for Rrn3                                                                                                                                          | this study |

|      |                                   |                                                   |            |
|------|-----------------------------------|---------------------------------------------------|------------|
| 2403 | pET28b His6-A49<br>186-415 (tWH)  | expression vector for His6-A49 186-415<br>(tWH)   | this study |
| 2404 | pET28b His6-A49<br>111-415        | expression vector for His6-A49 111-415<br>(tWH)   | this study |
| 2405 | pET28b A34.5-His6                 | expression vector for A34.5-His6                  | this study |
| 2406 | pET28b A34.5/A49<br>(1-186) -His6 | expression vector for A34.5/A49 (1-186) -<br>His6 | this study |
| 2407 | pET28b A34.5/A49<br>(1-110) -His6 | expression vector for A34.5/A49 (1-110) -<br>His6 | this study |

**Table 3: Oligonucleotides**

|      |                         |                                       |                                                                                |
|------|-------------------------|---------------------------------------|--------------------------------------------------------------------------------|
| 2973 | UE fwd                  | AGCTTAAATTGAAGTTTTTCTC                | amplification of upstream<br>element                                           |
| 2976 | CE fwd                  | TAGTTTGTAATGGGAGGGG                   | amplification of core element                                                  |
| 4176 | #pMax rev 320<br>nt     | ttactattgcggtaacattcat                | amplification of trx template<br>pMAX1 with#2973/2976                          |
| 4177 | #pMax rev 480<br>nt     | atattgtgtggagcaaagaat                 | amplification of trx template<br>pMAX1 with#2973/2976                          |
| 4178 | A34.5_NcoI_fwd          | tttccatgggaATGGGCTCCAAGCTTTCG         | cloning of A34.5/A49 1-186<br>in pET28b via NcoI/NotI PCR<br>from plasmid#2250 |
| 4179 | A34.5 NotI rev          | tttgcggccgcATCTCTATGTTTCTTTTT<br>CTTA | cloning of A34.5 in pET28b<br>via NcoI/NotI PCR from<br>plasmid#2250           |
| 4180 | A49_1-186<br>NotI_rev   | tttgcggccgctctatcgttgaagtaattt        | cloning of A34.5/A49 1-186<br>in pET28b via NcoI/NotI PCR<br>from plasmid#2250 |
| 4181 | A49 1-110 NotI<br>rev   | tttgcggccgctggacccttagattctt          | cloning of A34.5/A49 1-111<br>in pET28b via NcoI/NotI PCR<br>from plasmid#2250 |
| 4182 | A49 111 tWH<br>Nhe1 fwd | tttgcgtagcaaaaataaaaagtaagagtgatactcg | cloning of A49 111-415 in<br>pET28b via NheI/HindIII PCR<br>from plasmid #2250 |

|      |                     |                                |                                                                      |
|------|---------------------|--------------------------------|----------------------------------------------------------------------|
| 4183 | A49 NdeI fwd        | tttccatgatgatgccgtgaaaaggctgtt | Cloning of A49 in pET24a via NotI/NdeI PCR from plasmid #2250        |
| 4184 | A49 Not1 rev        | tttgcgccgcacgtcttgacctcttct    | cloning of A49 in pET24a via NotI/NdeI PCR from plasmid #2250        |
| 4185 | A49 tWH NheI fwd    | tttgctagcccattagccaatatcgatgc  | cloning of A49 tWH in pET28b via HindIII/NheI PCR from plasmid #2250 |
| 4186 | A49 tWH HindIII rev | ttttaagcttctaactcttgacctcttc   | cloning of A49 tWH in pET28b via HindIII/NheI PCR from plasmid #2250 |

**Table 4: Ratio of Pol I monomers and dimers in dependency on Rrn3 incubation determined by EM analyses**

| incubation time | - fold excess Rrn3 | dimers | monomers | % dimers | % monomers | % Pol I in dimers | % Pol I in monomers |
|-----------------|--------------------|--------|----------|----------|------------|-------------------|---------------------|
| 30 min          | 0.5                | 168    | 367      | 31.4     | 68.6       | 47.8              | 52.2                |
|                 | 1                  | 331    | 595      | 35.7     | 64.3       | 52.7              | 47.3                |
|                 | 5                  | 346    | 602      | 36.5     | 63.5       | 53.5              | 46.5                |
|                 | 10                 | 197    | 389      | 33.6     | 66.4       | 50.3              | 49.7                |
| 120 min         | 1                  | 2586   | 4992     | 34.1     | 65.9       | 50.9              | 49.1                |
|                 | 5                  | 2687   | 4876     | 35.5     | 64.5       | 52.4              | 47.6                |
| 120 min         | 10                 | 286    | 592      | 32.6     | 67.4       | 49.1              | 50.9                |
|                 | 10                 | 426    | 677      | 38.6     | 61.4       | 55.7              | 44.3                |

Incubation of recombinant Rrn3 with Pol I was performed in buffer B200 at 4°C

## Supplementary References

1. Blattner, C. et al. Molecular basis of Rrn3-regulated RNA polymerase I initiation and cell growth. *Genes Dev* **25**, 2093-105 (2011).
2. Hierlmeier, T. et al. Rrp5p, Noc1p and Noc2p form a protein module which is part of early large ribosomal subunit precursors in *S. cerevisiae*. *Nucleic Acids Res* **41**, 1191-210 (2013).
3. Merkl, P. et al. Binding of the termination factor nsi1 to its cognate DNA site is sufficient to terminate RNA polymerase I transcription in vitro and to induce termination in vivo. *Mol Cell Biol* **34**, 3817-27 (2014).
4. Musters, W. et al. Linker scanning of the yeast RNA polymerase I promoter. *Nucl. Acids Res.* **17**, 9661-9678 (1989).
5. Geiger, S.R. et al. RNA polymerase I contains a TFIIF-related DNA-binding subcomplex. *Mol Cell* **39**, 583-94 (2010).
6. Knutson, B.A., Luo, J., Ranish, J. & Hahn, S. Architecture of the *Saccharomyces cerevisiae* RNA polymerase I Core Factor complex. *Nat Struct Mol Biol* **21**, 810-6 (2014).

### Transcription gels used for Fig. 6

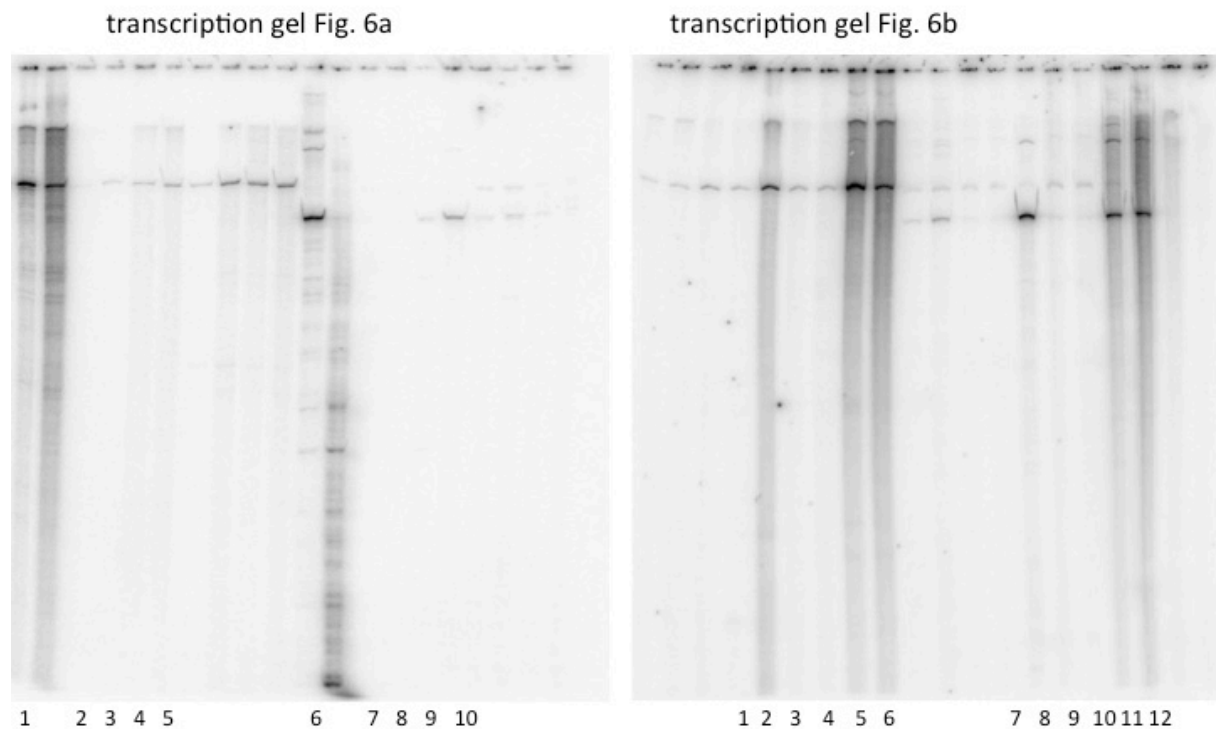

The lanes depicted in Fig. 6a and b are indicated
